# Supplementary material for: The PCM scaffold enables RNA localization to centrosomes
Source: PubMed Central journal article supplement — bioRxiv. 2024 Jan 14:2024.01.13.575509. Preprint. [Version 1] doi: 10.1101/2024.01.13.575509 (PMC10926663; doi:10.1101/2024.01.13.575509), 2024-01-14
Supplement: media-2.pdf [file media-2.pdf]

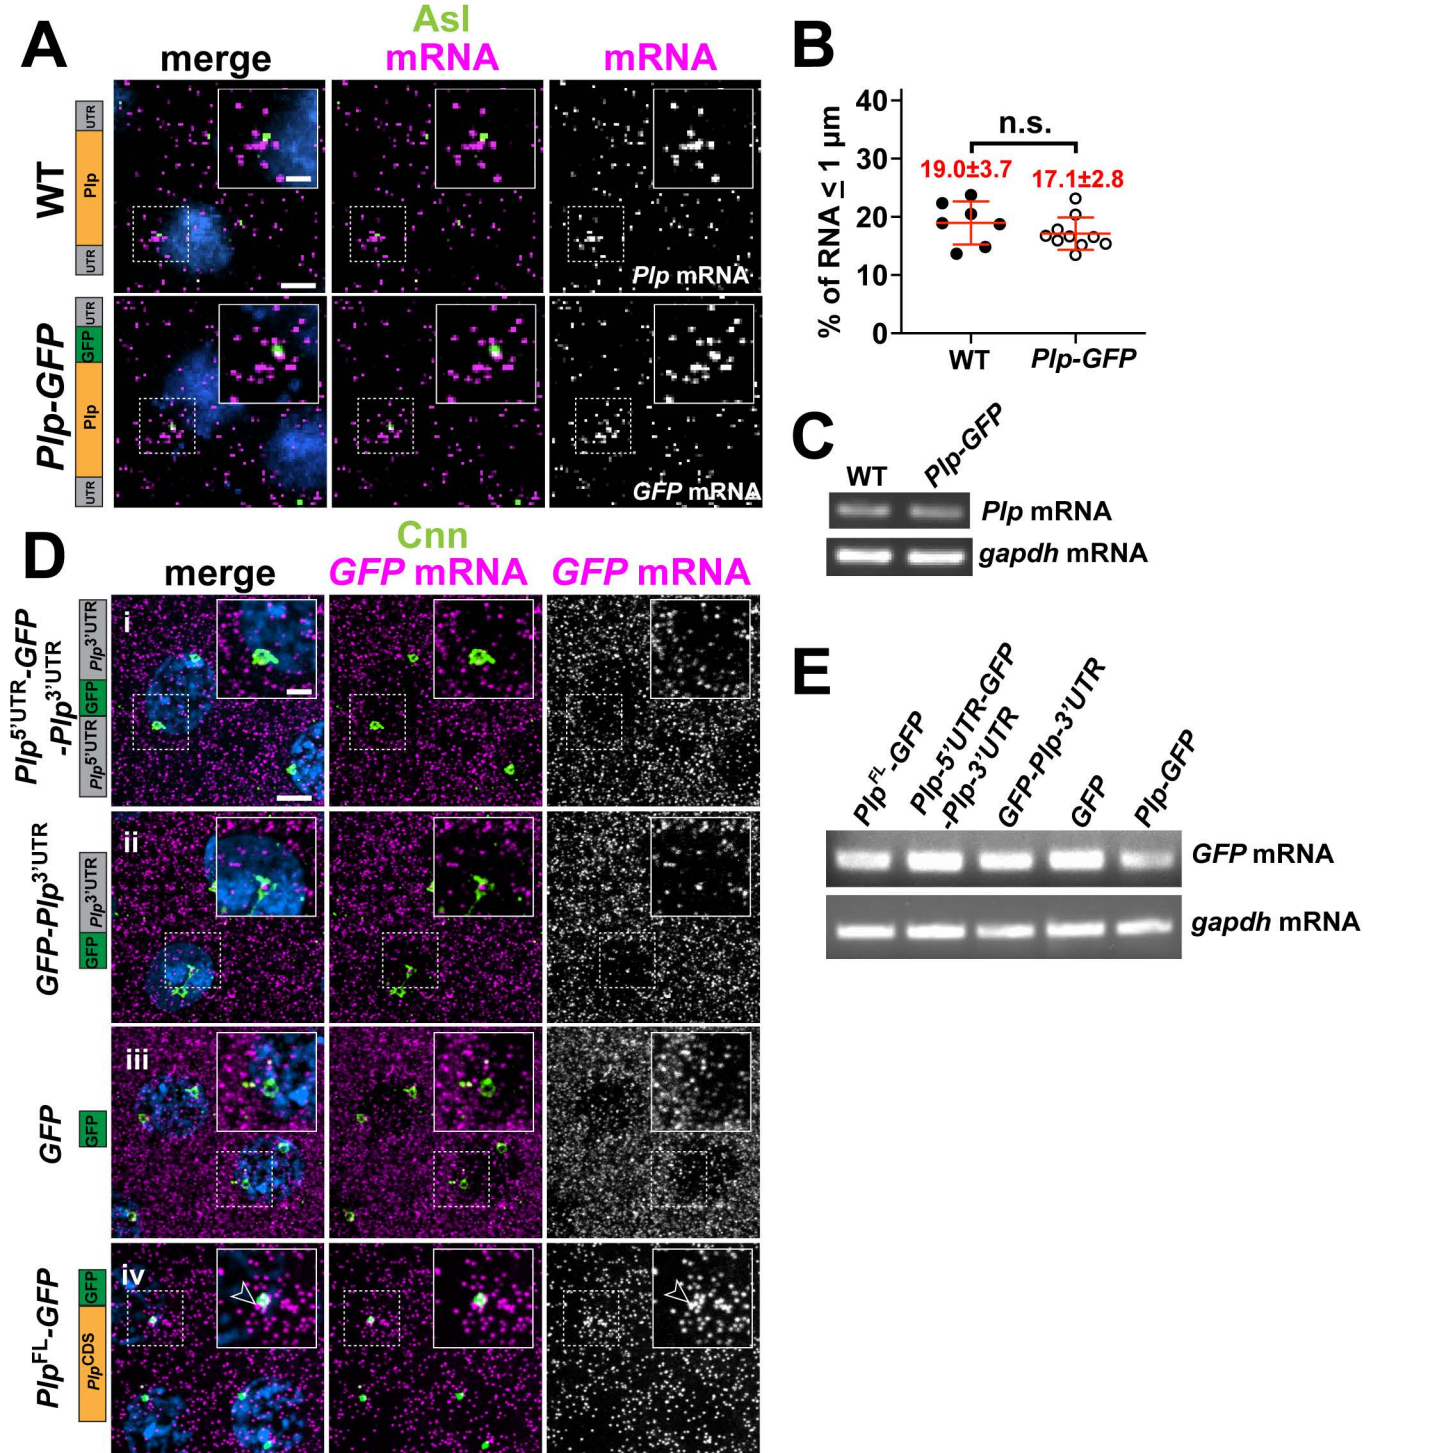

**Figure S2. *Pip* mRNA localization requires the *Pip* CDS.** (A) Maximum intensity projections of NC 11 embryos labeled with anti-Asl antibodies (green), *Pip* smFISH probes in WT, or *GFP* smFISH probes in *Pip-GFP* (magenta). Schematic diagrams of labelled RNAs are shown to the left. (B) The percentage of *Pip* mRNA localizing within 1  $\mu\text{m}$  of Asl. (C) Relative expression level of endogenous *Pip* RNA in 0-2 hr embryos of the indicated genotypes as assayed by RT-PCR. (D) Maximum intensity projections of NC 11 embryos labeled with anti-Cnn antibodies (green), *GFP* smFISH probes (magenta) and DAPI (blue) in the following genotypes: (i) *UAS-Pip*<sup>5'UTR-GFP-Pip</sup>3'UTR, (ii) *UAS-GFP-Pip*<sup>3'UTR</sup>, (iii) *UAS-GFP*, and (iv) *UAS-Pip*<sup>FL-GFP</sup>. Transgenes in (ii-v) were expressed using *matGAL4* in the presence of endogenous *Pip*. Insets are enlarged in the upper-right corners. Arrowheads mark *Pip* mRNA enriched at centrosomes. Schematic diagrams of GFP-tagged constructs are shown on the left. (E) Relative expression level of the GFP-tagged reporter RNAs in 0-2 hr embryos of the indicated genotypes was assayed by RT-PCR. Uncropped gels are available at <https://figshare.com/s/360dfc97047235a2b18a> and <https://figshare.com/s/71f35163efc18e879e7b>. Scale bars: 5  $\mu\text{m}$  (main panels); 2  $\mu\text{m}$  (insets).
